# Supplementary material for: Review of the phenotypes and genotypes of Bardet-Biedl syndrome from China
Source: Front Genet. 2023 Nov 15;14:1247557. doi: 10.3389/fgene.2023.1247557 (PMC10684923; doi:10.3389/fgene.2023.1247557)
Supplement: Supplementary file 1 [file DataSheet1.XLSX]

## Sheet: Sheet1
No	Gender	Age (year)	Region	Gene	Variant 1	Variant 2	Mutaion type	Family history (Y/N)	Consanguineous (Y/N)	Complaints								Vision impairment												Polydactyly				Renal abnormlaities				Urogenital anomalies				Mental retardation		Brith weight (kg)	Height (cm)	Short (Y/N)	Weight (kg)	BMI (kg/m2）	Overweght or obesity
										Obesity (Y/N)	Polydactyly (Y/N)	Polydipsia polyuria (Y/N)	Renal abnormalties(Y/N)	Reproductive system (Y/N)	Intellectual disability (Y/N)	Vision impairment (Y/N)	Others	Yes/No	Onset age （year）	Blindness （Y/N）	Onset age of blindness	Retinal pigmentation	nyctalopia	Nystagmus (Y/N)	Cataracts (Y/N)	Strabismus (Y/N)	Constricted visual fields (Y/N)	astigmatism (Y/N)	Others	Yes/No	Finger	Toe	others	Yes/No	Renal cyst or polycystic kidney (Y/N)	Renal dysfunction （Y/N）	Others	Yes/No	External genitalia (Y/N)	Hypospadias (Y/N)	Menarche & others	Yes/No	Intelligence
1	F	15	Hubei	2	c.534+1G>T		Ho (pUPD)	N	N							Y		Y	3			Y	Y							Y	Bi	Bi		N	N	N		N				N			160	N	90	35.2	2
2	F	21	Shanghai	12	c.188delC (p.Thr63*)	c.1993_1995del (p.665_665del)	CH	NA	NA	Y								Y	3	Y		Y								N	N	N		Y	Y	N		N				N		3	163	N	126.5	47.6	2
3	M	31	Shandong	5	c.1A>G (p.Met1?)	exon 1-5 del//c.(?_-60)- (386+1_387-1) del spanning 8.5 kb at 2q31.1	CH	N	N			Y	Y					Y	7			Y	Y							Y	Bi	Bi		Y	Y	Y		N				Y	Speech delay	4.2	172	N	99	33.5	2
4	F	23	Hunan	10	c.1391C>G (p.Ser464*)	c.184C>T (p.His62Tyr)	CH	？	N	Y	Y						Hypertension	Y	5			Y	Y	Y	Y	Y				Y	Bi	Bi		N	N	N		Y			Irregular	Y	WISC 62		155	N	73	30.4	2
5	F	7	Xinjiang	4	c.1106+2T>A		Ho	Y	Y	Y					Y			Y				N							Not cooperating, vitreous opacity	Y	Bi	Bi		Y		N		NA				Y	WISC 73, learning difficulties, dysgraphia	3.2	127.6	N	53	32.55	2
6	F	13	Xinjiang	10	c.539G>A (p.Gly180Glu)		Ho	N	Y	Y						Y		Y	1			Y							Optic nerve atrophy,limited abduction	Y	Bi	Bi		Y		N	Renal calculus	N				N		4.2	159	N	87	34	2
7	F	6	Xinjiang	12	c. 1320_1326dupTGTGATG (p.Gln443fs)		Ho	N	Y						Y			NA				N							Not cooperating	Y	R	L	Brachydactyly	N		N	Recurrent urinary tract infections	NA			Precocious puberty (B2)	Y	Speech & motor delay	3.045	95.8	-3	23	25	2
8	F	44	Sichuan	6	c.635C>T (p.Ser212Phe)	c.1664C>G (p.Thr555Arg)	CH	N	N				Y					Y		Y	childhood	Y			Y					Y	Bi	Bi		Y		Y	Renal atrophy	NA				Y	Intellectual disability						NA
9	M	27	Yunnan	NA				N	N	Y						Y		Y		Y	24	Y							Optic nerve atrophy	Y	Bi	N	Brachydactyly	N	N	N		Y	Micropenis			Y	Intellectual disability, not finish primary school		165	N	94	34.53	2
10	F	1.3	Shandong	10	c.891_897delinsTTTGT (p.Met298Leufs*5)		Ho	N	N	Y								N												N	N	N		N				NA				Y	Cannot speech, DQ 76.5	3.3	87	N	23.3	30.78	2
11	NA	29w	Guandong	7	c.718G>A (p.Gly240Ser)	c.497C>A (p.Ala166Asp)	CH	N	N									NA		Y		Y								Y	L	Bi		Y			Enlarged kidneys	NA				NA				Humerus length <-2SD in 29Weeks			NA
12	M	24w	Guandong	7	c.1002delT (p.Asn335Ilefs*47)	c.728C>A (p.Cys243Tyre)	CH	Y (G2 with similar abnormalities)	N									NA		Y		Y								Y	Bi	Bi		Y			Enlarged kidneys	NA				NA							NA
13	F	18	Anhui	NA				Y (brother)	N						Y		Growth retardation	Y				Y	Y							Y	Bi	Bi	Brachydactyly	N	N	N		Y			Oligomenorrhea	Y	Intellectual disability, not attending school		146	-2	72	33.78	2
14	NA	23w	Guizhou	1	c.421C＞T (p.Gln141*)		Ho	Y (case 15)	N		Y		Y					NA												Y	Bi	Bi		Y	Y		Enlarged kidneys	NA				NA							NA
15	M	8	Guizhou	1	c.421C＞T (p.Gln141*)		Ho	Y	N									Y				Y				Y		Y	Myopia	Y	Bi	Bi		Y	Y			NA				Y	WISC FIQ 85 (low)		130	N	45	26.63	2
16	M	12	Beijing	7	c.1002delT (p.Asn335Ilefs*47)	c.288_289delAG (p.Gly97Lysfs*7)	CH	N	N							Y		Y				Y	Y	Y	N		Y			Y	Bi	Bi	Finger/toe tip hypertrophy	Y		Y		Y	Cryptorchidism			Y	Special education school		161	N	86	33.18	2
17	M	22	Beijing	10	c.602G>A (p.Cys201Tyr)	c.539G>A (p.Gly180Glu)	CH	N	N							Y		Y	17			Y	Y	N	N	Y				Y	Bi	Bi	Brachydactyly	N	N	N		Y	Cryptorchidism			Y			175	N	90	29.39	2
18	M	11	Hunan	5	c.409T>C (p.Tyr137His)		Heter	N	N			Y						Y								Y				N	N	N		Y	Y	Y		Y	Cryptorchidism, Small testis and penis			Y			130	-2	32	18.93	0
19	M	4	Shanghai	12	c.1604T>C (p.Val535Gly)	c.173delA (p.Glu58Glufs*5)	CH	N	N	Y			Y					Y				Y								Y	R	Bi		Y	Y	Y	CKD	N				Y	DQ<47		102	N	32	30.76	2
20	M	4	Shanghai	12	c.1783T>C (p.Trp595Gly)	c.1749_1750delA (p.Arg584Aspfs*54)	CH	N	N	Y								N												Y	N	Bi		Y	Y	Y		Y	Micropenis			Y			103	N	30.5	28.75	2
21	M	1.2	Fujian	10	c.445_446insC (p.Leu149Profs*3)		Ho	N	N								Fever	Y				Y								Y	Bi	Bi		Y	Y	Y	Bladder diverticulum, Recurrent urinary tract infections	N				Y	Cannot speech,	3.9	84	N	14.7	20.83	2
22	M	13	Zhejiang	2	c.646C>T (p.Arg216*)	c.1206dupA (p.R403fs*216)	CH	N	N					Y			Growth retardation	Y	7			Y							Optic nerve atrophy	Y	N	L	Brachydactyly	N	N	N		Y	Dysplasia			Y	Intellectual disability, speech delay	3.5	152	-1	50	21.64	1
23	M	13	Shanghai	2	c.1148-1149dupTC (p.His384Serfs*34)		Ho	N	N	Y		Y			Y		Growth retardation	Y	7			Y								Y	N	Bi		Y	Y	Y	Renal atrophy	Y	Dysplasia	Y		Y	Learning difficulties, speech and motor delay	4	143	-2	60.7	29.68	2
24	M	9	Beijing	7	p.S117P	p.C243Y	CH	N	N									Y	5			Y							Optic nerve atrophy	Y	R	Bi		Y	Y			Y	Dysplasia			Y						28.8	2
25	M	9	Beijing	2	p.Y229X	p.R703X	CH	N	N									Y	7			Y							Optic nerve atrophy	Y	Bi	N		NA	NA	NA		Y	Dysplasia			N						28.3	2
26	M	6	Beijing	7	p.C243Y	c.849+1G>C	CH	N	N									Y	3			Y							Optic nerve atrophy	Y	Bi	Bi		NA	NA	NA		Y	Dysplasia			N						25.2	2
27	F	4	Beijing	4	p.K24X		Ho	N	N									Y	2			Y							Optic nerve atrophy	Y	Bi	R		NA	NA	NA		NA				Y							2
28	M	14	Beijing	1	p.A87Lfs*64	p.A447T	CH	N	N									Y	8			Y							Optic nerve atrophy	Y	N	Bi		Y	Y			Y	Dysplasia			Y						27.6	2
29	M	10	Beijing	7	p.G97Kfs*7		Ho	Y	N									Y	2			Y							Optic nerve atrophy	Y	R	Bi		Y	Y			Y	Dysplasia			Y						26.2	2
30	M	10	Beijing	NA				N	N									Y	2	Y		Y							Optic nerve atrophy	Y	N	Bi		NA	N			Y	Cryptorchidism			Y						27.6	2
31	M	23	Beijing	NA				N	N									Y	2	Y		Y		Y					Optic nerve atrophy	Y	L	Bi		NA	NA	NA		NA				Y						23.9	1
32	M	22	Sichuan	NA				N	N							Y		Y		Y	22	Y	Y		N					Y	L	Bi		NA	NA	NA		Y	Micropenis			Y	Speech delay		160	-2	80	31.25	2
33	M	13	Jiangxi	NA				N	N	Y								Y												Y	N	Bi	Brachydactyly	Y	Y	Y	Renal atrophy	Y	Small testis & penis	Y		Y			145	-1	59	28.06	2
34	M	15	Guandong	NA				？(polydactylism)	N			Y				Y	Emaciation	Y	1			Y	Y							Y	Bi	Bi		N	N	N		Y	Micropenis			Y	Cannot communication	2.7	162	N	65	24.77	1
35	F	29	Guandong	NA				Y (sister)	N	Y						Y		Y	8	Y		Y								Y	Bi	Bi		Y	N	Y		Y			Oligomenorrhea	N			153.5	-1	94	40	2
36	M	13	Xinjiang	NA				? (2 times of spontaneous abortion)	N								Cough	Y				Y								Y	Bi	Bi	Equinovarus	N	N	N		Y	Micropenis			Y	Learning difficulties		147	N	75	34.71	2
37	F	26	Zhejiang	NA			N	N	N									Y				Y			Y (Right)				Retinal detachment	Y	Bi	L		Y		N	Right renal dysplasia	N				Y	Learning difficulties (slight)		155	N	55	22.89	0
38	F	10	Beijing	NA				Y (brothter)	NA			Y						Y				Y								Y	L	Bi		Y	Y	Y	Renal atrophy, SKD stage 3	Y	Undeveloped			Y	Attention deficit		126	-2	26	16.38	0
39	M	10	Beijing	NA				Y？(aunt with uremia)	NA	Y			Y					Y	4			Y							Limited abduction	N	N	N		Y		Y	Right renal dysplasia	Y	Small testis & penis			Y	Attention deficit		131	-1	40	23.31	2
40	M	11	Beijing	NA				N	NA				Y				EP/Convulsion	Y				Y								N	N	N		Y		Y		Y	Micropenis			N			130	-2	54	31.95	2
41	F	8	Beijing	NA				N	NA				Y					Y	6			Y						Y		Y	N	Bi	Brachydactyly	Y	Y	Y	Renal atrophy	NA				Y			130	Y	45	26.63	2
42	M	12	Guizhou	NA				N	N					Y			micropenis	Y				Y								N	N	N		NA	NA	NA		Y	Small testis & penis			Y	IQ 88 (low),Learning difficulties,speech delay		135	-2	53	29.08	2
43	M	18	Beijing	NA				N	Y							Y		Y				Y	Y	Y	N					Y	Bi	Bi	Brachydactyly	N	N	N		Y	Small testis & penis			Y	Learning difficulties, speech at 5 years,WISC 26		165	N	80	29.38	2
44	M	20	Neimenggu	NA				NA	NA							Y		Y				Y	Y							Y	Bi	Bi		Y		Y		Y	Small testis & penis			N				Y			2
45	M	9	Shanxi	NA				N	Y	Y	Y				Y		Knockknees	Y				Y			Y					Y	Bi	Bi	7-finger in right hand, syndactyly in both feet	N	N	N		N			Undeveloped	Y	Learning difficulties, speech and motor delay				59		2
46	M	10	Fujian	NA				N	N								Weakness	NA				NA							Not cooperating	Y	Bi	N		N		N		Y	Cryptorchidism, micropenis			Y			123	-2	30	19.83	1
47	F	7	Hunan	NA	无			？	Y			Y					X-shaped leg	Y				Y								Y	Bi	Bi		Y		Y	Renal dysplasia or atrophy	NA				Y	low IQ		103	-3	24.5	23.09	2
48	F	20	Anhui	NA	无			N	Y	Y							Hyperglycemia	Y	9	Y	20									Y	L	Bi		N		N		N				Y	Intellectual disability, Speech delay		150	-1	110	48.89	2
49	M	36	Yunnan	NA				Y (case 50-51)	N									Y	2	Y	20				N	Y				Y	Bi	Bi		Y	Y	N		Y	Micropenis			Y	Intellectual disability, not finish primary school		145	-3	82	39	2
50	F	34	Yunnan	NA				Y	N									Y	2	Y	20									Y	Bi	Un		Y	Y	N		NA				Y	Intellectual disability, not finish primary school		142	-3	72	35.71	2
51	F	37	Yunnan	NA				Y	N									Y	2	Y	20									Y	Bi	Un		Y	Y			Y			Small uteruses	Y	Intellectual disability, not finish primary school		140	-3	72	36.73	2
52	M	28	Heilongjiang	NA				N	N				Y					Y	9	Y		Y	Y		Y					Y	N	Bi		Y		Y		Y	Aplasia			Y	Learning difficulties, speech delay, WISC 60		150	-3	75	33.33	2
53	M	16	Fujian	NA				N	N									Y												Y	Bi	Bi		Y		Y	Renal atrophy	Y	Cryptorchidism, aplasia			Y							2
54	F	36	Zhejiang	NA				N	N			Y						Y	4	Y	36	Y								Y	Bi	Bi		Y		Y	Renal echo enhancement	Y			Oligomenorrhea	Y			156	N	75	30.8	2
55	F	11	Zhejiang	NA				NA	NA	Y								Y	6			Y	Y							Y	L	L		Y		Y		Y			Absent ovaries, maybe vaginal effusion	Y	Learning difficulties	3.15	133	-1	59	33.35	2
56	M	adult	Sichuan	5	linkage analysis			N	Y									Y				Y								Y	Bi	Bi		NA	NA	NA		Y	Small testis & penis			Y							2
57	M	6	Guandong	NA				N	N		Y				Y			Y												Y	N	Bi		N	N	N		Y	Cryptorchidism			Y	Speech delay	2.9	96	-3	11	11.94	0
58	F	9.5	Guandong	NA				Y	N	Y							Growth retardation	Y		Y	6	Y								Y	L	Bi		Y		Y	Renal atrophy	NA				Y			104	-3	40	36.98	2
59	M	20	Beijing	NA				N	Y			Y			Y	Y		Y	2			Y	Y	Y						Y	Bi	Bi	Brachydactyly	Y		Y		Y	Aplasia			Y			154	-3	72	30.36	2
60	M	9	Beijing	NA				N	N							Y		Y				Y	Y							Y	N	R	Brachydactyly	Y		Y		Y	Small testis & penis			N			120	-2	48.5	33.68	2
61	M	7	Beijing	NA				N	N						Y	Y		Y				Y	Y							Y	L	N		NA	NA	NA		Y	Small testis & penis			Y	Learning difficulties		137	N	49	26.11	2
62	M	25	Shanxi	NA				N	N								Anemia	Y		Y		Y	Y							Y	Bi	Bi	Brachydactyly	N	N	N		Y	Small testis & penis			Y	Learning difficulties					39.4	2
63	M	16	Jiangsu	NA				Y	Y			Y				Y		Y	9			Y	Y							Y	Bi	Bi		N	N	N		Y	Small testis & penis			Y	Intellectual disability, not finish primary school		140	-3	65	33.16	2
64	M	9	Zhejiang	NA				N	N							Y		Y	5			Y		Y						Y	Bi	Bi	Brachydactyly	N	N	N		Y	Small testis & penis			Y	Intellectual disability (slight)		129	-1	42	25.24	2
65	F	17	Sichuan	NA				Y (case 66)	N									Y				Y	Y							Y	N	R	Brachydactyly	N	N	N		Y			Uterine & ovaries aplasia, amenorrhea	Y	Intellectual disability, not finish primary school		140	-3	68	34.69	2
66	F	22	Sichuan	NA				Y	N									Y				Y								Y	N	Bi	Brachydactyly	N	N	N		Y			Oligomenorrhea	N							2
67	M	37	Sichuan	7	linkage analysis			Y (case 68)	Y									Y				Y			Y	Y	Y		Limited abduction	Y	Bi	Bi		N	N	N		Y	Small testis			Y	Intellectual disability		160	-2	63	24.61	1
68	M	32	Sichuan	7	linkage analysis			Y	Y									Y					Y			Y			Amblyopia	Y	Y	Y		NA	NA	NA		Y	Micropenis			Y	Intellectual disability						2
69	M	9	Guandong	NA				Y	Y	Y								Y				Y	Y							Y	Bi	Bi		NA	NA	NA		Y	Micropenis			Y	Intellectual disability, speech delay						2
70	M	17	Guandong	NA				N	N									Y				Y								Y	Bi	Bi		Y		Y	Renal dysplasia	N				Y							2
71	F	12	Hebei	NA				N	Y							Y		Y	7			Y	Y							Y	Bi	Bi		N	N	N		NA				Y	Intellectual disability, speech delay		159	N	78	30.85	2
72	F	44	Hubei	NA				N	N									Y		Y	36	Y	Y		Y					Y	N	Bi	Syndactyly	N	N	N		Y			Irregularities	Y			145	-2	87.4	41.57	2
73	M	10	Xinjiang	NA				N	N									Y				Y							Amblyopia	Y	L	N	Syndactyly, thumb contracture	N	N	N		NA				Y	Intellectual disability, IQ 60		115	-3	50	37.81	2
74	F	14	Xinjiang	NA				N	N									Y				Y							Amblyopia	Y	R	N	7-finger in right hand	NA	NA	NA		Y			Aplasia, amenorrhea	Y	Intellectual disability, IQ 55		140	-3	60	30.61	2
75	M	8	Xinjiang	NA				N	N									Y	3			Y								Y	N	R		NA	NA	NA		Y	Cryptorchidism, micropenis			Y	Learning difficulties, Febrile convulsion		116	-2	41	30.47	2
76	F	16	Beijing	NA				N	Y							Y		Y	8			Y	Y							Y	Bi	Bi		NA	NA	NA		NA				Y	Intellectual disability, not finish primary school						2
77	M	13	Liaoning	NA				N	N							Y		Y	2			Y	Y	Y	N					Y	R	N		Y		Y		Y	Cryptorchidism			Y			108	-3	36	30.86	2
78	F	10.6	Beijing	NA				N	N			Y					Growth retardation	Y				Y								Y	Bi	Bi		Y		Y	Unclear renal contour and structure	NA			Undeveloped	Y	Intellectual disability		103	-3	28	26.39	2
79	M	14	Jiangsu	NA				Y	NA							Y		Y	3			Y		Y		Y				Y	Bi	Bi	Brachydactyly	N	N	N		Y	Small testis & penis			Y	Intellectual disability		150	-2	66	29.33	2
80	M	26	Fujian	NA				Y (case 81)	Y								Emaciation	Y	16			Y	Y							Y	Un	Bi		NA	NA	NA		Y	Small testis and penis			Y							2
81	F	22	Fujian	NA				Y	Y							Y		Y				Y	Y							Y	N	Un		NA	NA	NA		Y	Dysplasia			Y							2
82	M	10	Beijing	NA				N	N	Y					Y	Y	Growth retardation	Y	6			Y								Y	N	Bi		NA	NA	NA		Y	Cryptorchidism, small testis			Y	Intellectual disability, speech at 4 years, extramely lower WISC score	3.9	140	N	49	25	2
83	M	11	Guandong	NA				N	N				Y					Y	5			Y	Y		N	Y				Y	Bi	Bi		Y		Y		Y	Small testis & penis	Y		Y		3.5			64		2
84	NA	Fetus	Zhejiang	1	c.1339G>A (p.Ala447Thr)		Ho	Y (3 voluntary terminations of pregnancy with congenital malformation)	N		Y		Y					NA												Y	Y	Y		Y			Renal echo enhancement	NA				NA	Widening lateral ventricle						NA
85	M	12	Beijing	2	c.534+1G>T		Ho	N	N							Y		Y	6			Y						Y		Y	N	Y		N		N		N				Y	Learning difficulties						2
86	F	26	Beijing	5	c.613C>T (p.Gln205*)		Ho	Y (case 87)	N							Y		Y	3	Y		Y	Y	Y		Y				Y	Bi	Bi		N		N		Y	Genital anomalies			N							2
87	M	20	Beijing	5	c.613C>T (p.Gln205*)		Ho	Y	N							Y		Y	3	Y		Y	Y	Y						Y	Bi	Bi		N		N		Y	Genital anomalies			N							2
88	F	13	Beijing	10	c.1391C>G (p.Ser464*)	c.539G>A (p.Gly180Glu)	CH	N	N							Y		Y	5			Y								Y	Bi	Bi		N		N		Y			Hypogonadism	N							2
89	F	9	Beijing	12	c.155delC (p.Ser52*)	c.1584T>G (p.Tyr528*)	CH	N	N							Y		Y	5			Y		Y						Y	Bi	Bi		N		N		N				Y	Learning difficulties, speech delay						2
90	F	7.5	Guandong	10	c.1949delA (p.His650Profs*12)	c.1391C>G (p.Ser464*)	CH	N	N	Y				Y (CPP)				Y	2			Y								Y	Bi	L	Small hands and feet	N		N		Y			Central precocious puberty	Y	WISC 75, motor and speech delayed, attention problems and a poor academic performance	3	127.8	N	38	23.3	2
91	NA	Fetus	Guandong	10	c.784_785delGA (p.Glu262Asnfs*41)	c.1812dupT (p.Asn605*)	CH	Y	N				Y				ventricular septal defect	NA												N	N	N		Y			Enlarged hyperechogenic kidneys	NA				NA							NA
92	NA	Fetus	Fujian	1	c.1177C>T (p.Arg393*)		Ho	NA	NA				Y					NA												N	N	N		Y	Y		Enlarged kidneys	NA				NA							NA
93	NA	NA	NA	1				NA	NA									N				N								Y				Y		Y	Nephronophthisis	NA				N							NA
94	NA	NA	NA	2				NA	NA									Y				N			Y					N	N	N	Brachydactyly	Y		N	Nephronophthisis	NA				Y	Developmental delay						NA
95	NA	NA	NA	12				NA	NA									Y				Y								Y				Y		N	Nephronophthisis	NA				Y	Developmental delay						NA
96	NA	NA	NA	12				NA	NA									N				N								Y				Y		Y	Nephronophthisis	NA				N							NA
97	NA	NA	NA	16				NA	NA									N				N								N	N	N	Brachydactyly	Y		Y	Nephronophthisis	NA				Y	Developmental delay						NA
98	M	NA	Hebei	9	c.1114C>T (p.Gln372*)		Ho	Y (case 94)	N							Y		Y				Y								Y	Bi	Bi		N	N	N		NA				Y	Intellectual disability		169	N	90.5	31.69	2
99	M	NA	Hebei	9	c.1114C>T (p.Gln372*)		Ho	Y	N							Y		Y				Y								Y	L	Bi		N	N	N		NA				Y	Intellectual disability		155	N	76	31.63	2
100	M	17	Hunan	9	c.445C>T (p.Arg149*)		Ho	N	Y	Y		Y					Hyperglycemia	Y				Y								Y	Bi	Bi		Y	Y	N	Abnormal structure	N				Y	Intellectual disability, not finish primary school						2
101	M	21	Chongqing	2	c.2059+1G>C	c.563delT (p.Ile188Thrfs*13)	CH	N	N									Y		Y		Y	Y	Y	Y				Optic nerve atrophy	Y				Y			Renal dysplasia	N				Y	Intellectual disability, not finish primary school			Y		33.2	2
102	M	13	Chongqing	2	c.79A>C (p.Thr27Pro)		Ho	Y (case 98)	Y									Y				Y	Y			Y	Y			N	N	N		N	N	N		N				Y	Intellectual disability, not finish primary school			Y		19.53	0
103	F	19	Chongqing	2	c.79A>C (p.Thr27Pro)		Ho	Y	Y									Y				Y	Y	Y		Y	Y			Y				N	N	N		Y			Small ovaries	N				Y		24.44	1
104	M	30	Chongqing	2	c.534+1G>T	c..1278A>G (p.Glu426Glu)	CH	Y (case 100)	N									Y				Y	Y			Y	Y			N	N	N		N	N	N		Y	Dysplasia			N				Y		26.72	1
105	M	29	Chongqing	2	c.534+1G>T	c..1278A>G (p.Glu426Glu)	CH	Y	N									Y		Y		Y	Y				Y			N	N	N		N	N	N		Y	Dysplasia			N				Y		29.05	2
106	F	37	Chongqing	2	c.944G>A (p.Arg315Gln)	c.1015C>T (p.Arg339*)	CH	N	N									Y		Y		Y	Y		Y		Y			N	N	N		N	N	N		N				N				Y		28.76	2
107	M	26	Chongqing	2	c.534+1G>T	c.2059+1G>T	CH	N	N									Y				Y	Y		Y		Y			Y				NA	NA	NA		NA				N				Y		32.3	2
108	F	13	Chongqing	4	c.932G>A (p.Gly311Asp)	c.31C>T (p.Gln11*)	CH	N	N									Y				Y	Y				Y			Y				NA	NA	NA		Y			Ovarian cyst	Y				Y		30	2
109	M	8	Chongqing	7	c.1002delT (p.Asn335Ilefs*47)		Ho (mUPD ?)	N	N									Y				Y	Y				Y			NA	NA	NA		NA	NA	NA		NA				N				矮小		26.3	2
110	F	8	Chongqing	7	c.728G>A (p.Cys243Tyr)	c.1395T>A (p.Tyr465*)	CH	N	N									Y				Y	Y				Y		Exotropia	Y				N	N	N		N				Y				矮小		41.42	2
111	M	27	Chongqing	9	c.445C>T (p.Arg149*)	c.263+2delT	CH	N	N									Y		Y		Y	Y		Y		Y			Y				N	N	N		N				N						26.1	1
112	M	18	Chongqing	9	c.72delT (p.Leu25Cysfs*16)	c.1198+1G>A	CH	N	N									Y				Y	Y							Y				Y	Y			N				N						30.42	2
113	F	20	Guandong	2	c.235T>G (p.Thr79Pro)	c.534+1G>T	CH	Y (case 109-112	N									Y				Y	Y	Y						Y	Bi	Bi	Brachydactyly, syndactyly	N	N	N		Y			Small ovaries & uteruses	NA	Ataxia/poor coordination		160	N	71.7	28.01	2
114	F	18	Guandong	2	c.235T>G (p.Thr79Pro)	c.534+1G>T	CH	Y	N									Y				Y	Y	Y						Y	Bi	Bi	Brachydactyly, syndactyly	N	N	N		Y			Small ovaries & uteruses	NA	Ataxia/poor coordination		157	N	103.4	41.9	2
115	F	16	Guandong	2	c.235T>G (p.Thr79Pro)	c.534+1G>T	CH	Y	N									Y				Y	Y	Y						Y	Bi	Bi	Brachydactyly, syndactyly	N	N	N		Y			Small ovaries & uteruses	NA	ataxia/poor coordination		167	N	84.1	30.2	2
116	M	2	Guandong	2	c.235T>G (p.Thr79Pro)	c.534+1G>T	CH	Y	N							Y		Y				Y	Y	Y						Y	Bi	Bi	Brachydactyly, syndactyly	N	N	N		Y	Small testis & penis			Y			82	-1	17.8	26.5	2
117	F	NA	Guandong	2？				Y	N									NA												NA	NA	NA		NA	NA	NA		NA				NA			NA		NA	NA	NA
118	F	19	Guandong	6	c.748G>A (p.Gln250Arg)		Ho	N	Y							Y		Y		Y		Y	Y	Y						Y	Bi	Bi		N	N	N		N				N			155	-1	57.5	23.9	0
119	NA	Fetus	Guandong	7	4q26q27 deletion including BBS7	c.1002del (p.Asn335Ilefs*47) NM_176824	CH	Y (case 115)			Y		Y					NA												Y	R	N		Y			Enlarged kidneys	NA				NA							NA
120	F	Fetus	Guandong	7	4q26q27 deletion including BBS7	c.1002del (p.Asn335Ilefs*47) NM_176824	CH	Y			Y		Y					NA												Y	Bi	N		Y			Enlarged kidneys	NA				NA							NA
121	M	12	Beijing	7	c.1002del (p.Asn335Ilefs*47)	c.288_289delAG (p.Gly97LysfsTer7)	CH	N	N							Y		Y	8			Y								Y	Bi	Bi		Y			Bilateral diffuse nephropathy	Y	Cryptorchidism			Y	At specialized school as learning difficulties		161	N	86	33.18	2
122	M	5	Beijing	7	c.1002del (p.Asn335Ilefs*47)		Ho	N	N							Y		Y				Y	Y	Y						Y	Bi	Bi	Brachydactyly	NA	NA	NA		N				Y			115	N	27.5	20.79	2
123	M	13	Beijing	10	c.1063C>T (p.Gln355*)	c.378G>A (p.Trp126*)	CH	N	N							Y		Y	10	Y		Y	Y							Y	N	Bi		NA	NA	NA		Y				Y			157	N	71	28.8	2
124	M	22	Beijing	10	c.602G>A (p.Cys201Tyr)	c.539G>A (p.Gly180Glu)	CH	N	N							Y		Y	16			Y	Y							Y	Bi	Bi		NA	NA	NA		Y				Y			175	N	90	29.39	2
125	F	11	Beijing	12	c.1276T>C (p.Cys426Arg)		Ho	Y	N							Y		Y	3			Y	Y							Y	Un	Un		NA	NA	NA		NA				Y			160	N	70	27.34	2
126	M	13	Beijing	无	negative			N	N							Y		Y	2			Y	Y	Y				Y		Y	Bi	Bi		NA	NA	NA		Y	Genital anomalies			Y			160	N	85	33.2	2
127	M	26	Hebei	2	c.563delT (p.Ile188Thrfs*13)	c.1237C>T p.(Arg413*)	CH	NA	NA							Y		Y	4			Y					Y			Y				NA	NA	NA		NA				N						28.2	2
128	F	35	Yunnan	7	c.389_390delAC (p.Asn130Thrfs*3）	NM_176824.2	Ho	Y (case 129-130	N									Y				Y	Y	N		Y				Y	R	Bi	Brachydactyly	Y	Y			Y			Irregular	Y	Learning difficult, speech delay		136	-3	60	32.44	2
129	F	39	Yunnan	7	c.389_390delAC (p.Asn130Thrfs*3）		Ho	Y	N									Y				Y	Y	N		Y				Y	L	Bi	Brachydactyly	Y	Y			Y			Irregular	Y	Learning difficult, speech delay		136	-3	70	37.85	2
130	M	37	Yunnan	7	c.389_390delAC (p.Asn130Thrfs*3）		Ho	Y	N									Y				Y	Y	N		Y				Y	Bi	Bi	Brachydactyly	Y	Y			Y	Micropenis		Hypogonadism	Y	Learning difficult, speech delay		149	-3	72.5	32.66	2
131	NA	Fetus	Guandong	7?				Y (case 132)	N		Y		Y					NA												Y	R	R		Y			Enlarged hyperechogenic kidneys	NA				NA							NA
132	NA	Fetus	Guandong	7	c.288_289delAG (p.Gly97Lysfs*7)	c.338C>A (p.Ala113Asp)	CH	Y	N		Y		Y					NA												Y	R	R		Y			Enlarged hyperechogenic kidneys	NA				NA							NA
133	M	12	Fujian	7	c.389_390delAC (p.Asn130Thrfs*3）		Ho	Y (case 153)	N									Y				Y				Y				Y	Bi	Bi		N	N	N		Y	Micropenis			Y	Intellectual disability, speech delay						2
134	M	10	Fujian	7	c.389_390delAC (p.Asn130Thrfs*3）		Ho	Y	N									Y				Y				Y				Y	Bi	Bi		N	N	N		Y	Micropenis			Y	Intellectual disability, speech delay						2
135	F	10	Beijing	6	c.1192C>T (p.Gln398*)	c.1175C>T (p.Thr392Met)	CH	Y (case 134)	N			Y						Y		Y		?								Y	L	L		Y	Y	Y	Renal atrophy, chronic kidney disease stage 3	NA				Y	Impaired intellectual development & attention abnormalities		126	-2	26	16.38	0
136	M	2	Beijing	6	c.1192C>T (p.Gln398*)	c.1175C>T (p.Thr392Met)	CH	Y	N									Y				Y								N	N	N		NA	NA	NA		NA				Y	Cannot speech						NA
137	F	NA	Zhejiang	2	c.563delT (p.Ile188Thrfs*13)		Ho	N	N									Y				Y	Y							Y				NA	NA	NA		NA				Y	Speech delay & poor coordination						2
138	M	Adult	Zhejiang	2	c.1438C>T (p.Arg480*)		Ho	N	Y									Y				Y	Y							Y				NA	NA	NA		Y	Genital anomalies			Y	Speech delay & poor coordination						2
139	M	NA	Zhejiang	6	c.1496G>A (p.Cys499Tyr)		Ho	N	Y									Y				Y	Y							Y				NA	NA	NA		NA				Y	Speech delay & poor coordination						2
140	M	NA	Zhejiang	3	c.364C>T (p.Arg122*)		Ho	Y (case 139)	N									Y				Y								Y				NA	NA	NA		NA				Y	Speech delay & poor coordination						2
141	F	NA	Zhejiang	3	c.364C>T (p.Arg122*)		Ho	Y	N									Y				Y								Y				NA	NA	NA		NA				Y	Speech delay & poor coordination						2
142	M	NA	Zhejiang	13	c.1382A>G (p.Tyr461Cys)	c.1601G>A (p.Arg534Gln)	CH	N	N									Y				Y								Y				NA	NA	NA		NA				Y	Speech delay & poor coordination						2
143	F	4	Henan	4	c.70A>T (p.K24X)		Ho									Y		Y				Y								Y	Bi	R		N	N	N		NA				Y			110	N	25	20.66	2
144	M	NA	Sichuan	7?				Y	N									NA												NA	NA	NA		NA	NA	NA		NA				NA							NA
145	F	NA	Sichuan	7?				Y (case 144-146)	Y									NA												NA	NA	NA		NA	NA	NA		NA				NA							NA
146	M	NA	Sichuan	7?				Y	Y									NA												NA	NA	NA		NA	NA	NA		NA				NA							NA
147	M	37	Sichuan	7	c.1666A>G (p.Ser556Arg)		Ho	Y	Y									Y				Y		Y		Y	Y		Ptosis	Y	Y	Y		Y		Y	Renal abnormalities.	Y	Small testes & genitalia			Y	Learning difficulties					25.6	1
148	M	32	Sichuan	7	c.1666A>G (p.Ser556Arg)		Ho	Y	Y									Y				Y		Y		Y	Y		Ptosis	Y	Y	Y		Y		Y	Renal abnormalities.	Y	Small testes & genitalia			Y	Learning difficulties					25.2	1
149	F	3(Fetus)	Taiwan	NA	.			N	N		Y			Y			Hydrometrocolpos, vaginal atresia	Y				Y								Y	R	Bi		N		N		Y			Hydrometrocolpos, vaginal atresia	Y	Speech and motor delay	2.2					2
150	M	12	Anhui	NA				Y (case 149)	NA							Y		Y	3			Y	Y							Y	Bi	N		NA	NA	N		Y			Hypogenitalism	Y	Severe mental retardation						2
151	F	9	Anhui	NA				Y	NA							Y		Y				Y	Y							Y				NA	NA	N		Y				Y							2
152	M	15	Shanghai	NA				Y (case 151)	N							Y		Y	2			Y	Y							N	N	N		N	N	N		Y	Small testis, absent right teeticle			Y			132	-3	37.5	21.52	0
153	M	9.5	Shanghai	NA					N							Y		Y	5			Y	Y							N	N	N		N	N	N		NA				Y			100	-3	20	20	1
NA, no data; Y, yes; N, no; F, female; M, male; UPD, uniparental disomy；Bi, bilateral; Un, unilateral; R, right; L, left; WCIS, Webster Children's Intelligence Scale. In "Overweight & obesity": 0, no overweight or obesity; 1, overweight; 2, obesity; BP, blood pressure; NAFLD, non-alcoholic fatty liver disease (by ultrasound). Hb, hemoglobin.
[truncated: 11 more columns]
